# Supplementary material for: Nanoreinforced xylan–cellulose composite foams by freeze-casting
Source: Royal Society of Chemistry journal article supplement (doi:10.1039/c2gc35413f), 2012-01-01

## Electronic Supplementary Information

### *Figure a: AFM image of obtained cellulose nanocrystals (CNCs)*

The AFM image of CNCs was obtained by a Nanoscope Dimension 3100 SPM, with a Nanoscope IIIa controller. Images were collected in tapping mode in air, with a phosphorus doped silicon tip with a nominal frequency of 150 kHz.

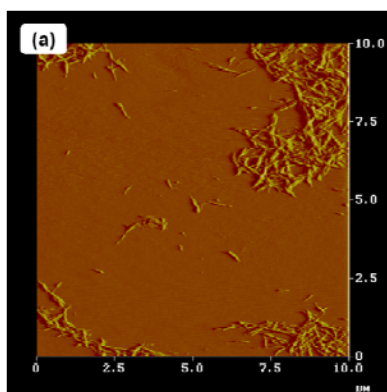

### *Figure b: Birefringence*

Shear-induced birefringence of a 1% (w/w) CNC suspension viewed between crossed polars.

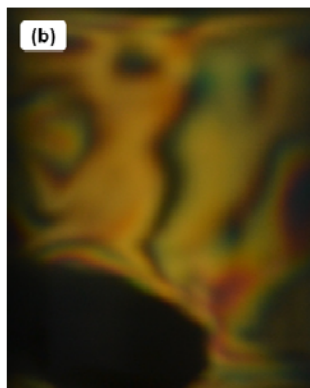

Supplement: c2gc35413f.pdf [file c2gc35413f.pdf]
